# Supplementary material
Source: PubMed Central journal article supplement (PMC3910839)
Supplement: AAC.01639-13_zac002142556so1.pdf [file AAC.01639-13_zac002142556so1.pdf]

438 **Table S1. Lp1 isolates used in the intracellular assay**

| <i>L. pneumophila</i><br>serogroup 1 | AZM<br>MIC (µg/ml) | Solithromycin<br>MIC (µg/ml) | Sequence type<br>(ST) |
|--------------------------------------|--------------------|------------------------------|-----------------------|
| Lp1.2                                | 0.0625             | 0.015                        | ST211                 |
| Lp1.161                              | 0.0625             | 0.015                        | ST211                 |
| Lp1.13                               | 0.125              | 0.031                        | ST222                 |
| Lp1.47                               | 0.125              | 0.031                        | ST222                 |
| Lp1.53                               | 0.125              | 0.031                        | ST222                 |
| Lp1.103                              | 0.125              | 0.015                        | ST211                 |
| Lp1.144                              | 0.125              | 0.031                        | ST195                 |
| Lp1.177                              | 0.125              | 0.015                        | ST211                 |
| Lp1.302                              | 0.125              | 0.031                        | ST47                  |
| Lp1.167                              | 0.25               | 0.015                        | ST36                  |
| Lp1.167                              | 0.25               | 0.015                        | ST36                  |
| Lp1.119                              | 0.25               | 0.031                        | ST1                   |
| Lp1.23                               | 1                  | 0.031                        | ST1                   |
| Lp1.159                              | 1                  | 0.031                        | ST52                  |
| Lp1.135                              | 2                  | 0.031                        | ST1                   |
| Lp1.153                              | 2                  | 0.031                        | ST1                   |
| Lp1.187                              | 2                  | 0.031                        | ST1                   |
| Lp1.220                              | 2                  | 0.031                        | ST1                   |

439

440
